# Supplementary material for: The dark kinase STK32A regulates hair cell planar polarity opposite of EMX2 in the developing mouse inner ear
Source: eLife journal article supplement (doi:10.7554/elife.84910), 2023-05-05
Supplement: supp [file elife-84910-supp-v1.zip]

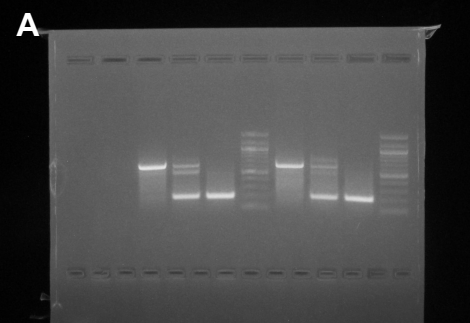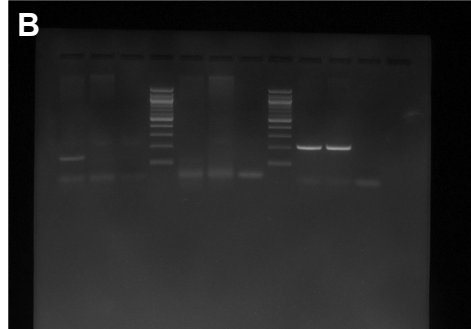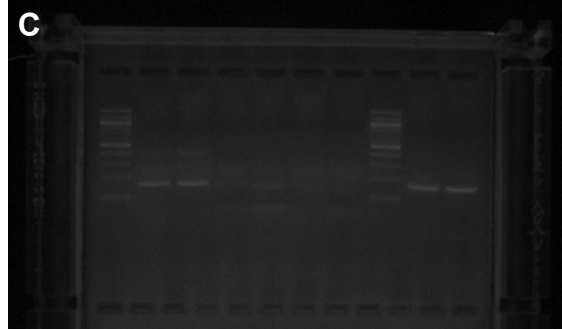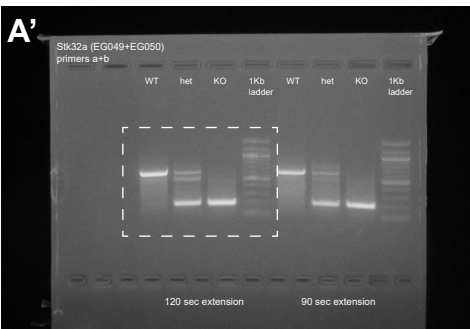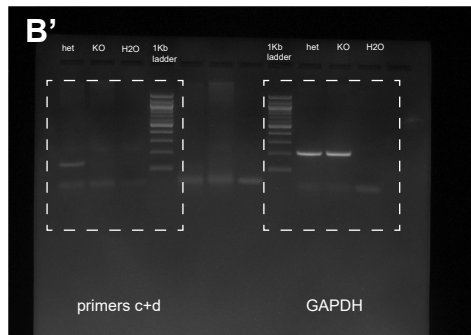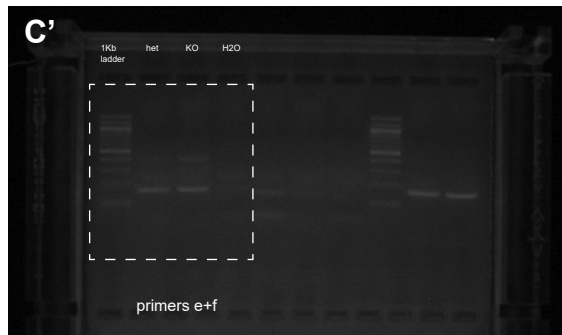

Figure 4 - figure supplement 1E - source

Figure 4 - figure supplement 1F - source
