# Supplementary material for: The dark kinase STK32A regulates hair cell planar polarity opposite of EMX2 in the developing mouse inner ear
Source: eLife. 2023 May 5;12:e84910. doi: 10.7554/eLife.84910 (PMC10202454; doi:10.7554/eLife.84910)
Supplement: Supplementary file 1. — Summary of genes that are down-regulated in the absence of Emx2. Sequencing results were analyzed using Bioconductor DESeq as well as post hoc-analysis using Swish, and Benjamini-Hirshberg false discover rate was used to normalize data across all transcripts and produce adjusted p-values based on log2-fold changes between Emx2 Cre/Cre and WT controls. Only genes with adjusted P-values <0.05 are listed. Additional data for genes highlighted with blue shading are presented in Figure 1—figure supplement 1. [file elife-84910-supp1.xlsx]

## Sheet: Decreased expression
Table 1: Genes with decreased transcription in the Emx2 mutant utricle
Ensemble ID	Gene Name	Chromosome	Description	log2 Fold Change	p-value	adjusted p-value
ENSMUSG00000020651	Slc26a4	12	solute carrier family 26, member 4	-1.22634	1.24608e-41	2.05167e-37
ENSMUSG00000060371	Caln1	5	calneuron 1	-0.839284	1.05489e-11	5.7896e-08
ENSMUSG00000028172	Tacr3	3	tachykinin receptor 3	-0.744294	8.1786e-09	1.12217e-05
ENSMUSG00000051920	Rspo2	15	R-spondin 2	-0.720194	2.69827e-08	2.46817e-05
ENSMUSG00000028546	Elavl4	4	ELAV like RNA binding protein 4	-0.67552	1.90309e-07	0.000116054
ENSMUSG00000040703	Cyp2s1	7	cytochrome P450, family 2, subfamily s, polypeptide 1	-0.672824	4.88951e-11	2.01264e-07
ENSMUSG00000066000	Zfp979	4	zinc finger protein 979	-0.624509	4.62359e-07	0.00023271
ENSMUSG00000031112	Stk26	X	serine/threonine kinase 26	-0.606011	1.32465e-08	1.55789e-05
ENSMUSG00000028176	Lrrc7	3	leucine rich repeat containing 7	-0.604056	2.24872e-06	0.000698587
ENSMUSG00000027359	Slc27a2	2	solute carrier family 27 (fatty acid transporter), member 2	-0.582276	1.09892e-08	1.39182e-05
ENSMUSG00000039942	Ptger4	15	prostaglandin E receptor 4 (subtype EP4)	-0.562677	3.87819e-06	0.00110157
ENSMUSG00000033849	B3galt2	1	UDP-Gal:betaGlcNAc beta 1,3-galactosyltransferase, polypeptide 2	-0.542901	2.40245e-05	0.00429961
ENSMUSG00000037716	Ccdc33	9	coiled-coil domain containing 33	-0.538421	8.32421e-07	0.00031874
ENSMUSG00000037681	Esyt3	9	extended synaptotagmin-like protein 3	-0.536818	4.66409e-07	0.00023271
ENSMUSG00000042254	Cilp	9	cartilage intermediate layer protein, nucleotide pyrophosphohydrolase	-0.53589	6.82462e-07	0.000303696
ENSMUSG00000041324	Inhba	13	inhibin beta-A	-0.534051	9.974e-06	0.00213275
ENSMUSG00000026065	Slc9a4	1	solute carrier family 9 (sodium/hydrogen exchanger), member 4	-0.529418	3.67491e-05	0.00605074
ENSMUSG00000055022	Cntn1	15	contactin 1	-0.528443	3.59064e-07	0.000197066
ENSMUSG00000024066	Xdh	17	xanthine dehydrogenase	-0.526975	2.97168e-05	0.00494229
ENSMUSG00000026824	Kcnj3	2	potassium inwardly-rectifying channel, subfamily J, member 3	-0.52495	2.9246e-05	0.00491363
ENSMUSG00000024749	Tmc1	19	transmembrane channel-like gene family 1	-0.520293	9.9077e-06	0.00213275
ENSMUSG00000035032	Nek11	9	NIMA (never in mitosis gene a)-related expressed kinase 11	-0.515946	4.24229e-05	0.00664499
ENSMUSG00000051596	Otop1	5	otopetrin 1	-0.504656	6.88292e-10	1.61896e-06
ENSMUSG00000028222	Calb1	4	calbindin 1	-0.497194	0.000116692	0.0146667
ENSMUSG00000035964	Tmem59l	8	transmembrane protein 59-like	-0.491557	0.000137922	0.0166426
ENSMUSG00000062184	Hs6st2	X	heparan sulfate 6-O-sulfotransferase 2	-0.486253	2.67774e-08	2.46817e-05
ENSMUSG00000056973	Ces1d	8	carboxylesterase 1D	-0.481365	0.000122351	0.0152614
ENSMUSG00000001870	Ltbp1	17	latent transforming growth factor beta binding protein 1	-0.481265	7.53129e-07	0.000310899
ENSMUSG00000029188	Slc34a2	5	solute carrier family 34 (sodium phosphate), member 2	-0.480231	1.08593e-06	0.000388692
ENSMUSG00000059991	Nptx2	5	neuronal pentraxin 2	-0.469161	0.0002537	0.025013
ENSMUSG00000097040	2610316D01Rik	3	RIKEN cDNA 2610316D01 gene	-0.464063	0.000331538	0.0296672
ENSMUSG00000030302	Atp2b2	6	ATPase, Ca++ transporting, plasma membrane 2	-0.462083	1.82878e-07	0.000116054
ENSMUSG00000032373	Car12	9	carbonic anhydrase 12	-0.450309	5.754e-07	0.000263165
ENSMUSG00000049571	Cfap46	7	cilia and flagella associated protein 46	-0.450223	6.92052e-06	0.00175302
ENSMUSG00000074240	Cib3	8	calcium and integrin binding family member 3	-0.449177	6.45268e-05	0.00940208
ENSMUSG00000038775	Vill	9	villin-like	-0.448274	0.000258563	0.0253407
ENSMUSG00000046719	Nxph3	11	neurexophilin 3	-0.445662	0.000567568	0.0402802
ENSMUSG00000019892	Lrriq1	10	leucine-rich repeats and IQ motif containing 1	-0.442611	2.85737e-05	0.00490069
ENSMUSG00000034755	Pcdh11x	X	protocadherin 11 X-linked	-0.441322	0.000460274	0.0366107
ENSMUSG00000003436	Dll3	7	delta like canonical Notch ligand 3	-0.438126	0.000191742	0.0210469
ENSMUSG00000026686	Lmx1a	1	LIM homeobox transcription factor 1 alpha	-0.437094	0.000511669	0.0382938
ENSMUSG00000044646	Zbtb7c	18	zinc finger and BTB domain containing 7C	-0.434762	8.37258e-06	0.00194161
ENSMUSG00000106515	Gm30382	3	predicted gene, 30382	-0.433683	0.000616626	0.0423031
ENSMUSG00000021730	Hcn1	13	hyperpolarization-activated, cyclic nucleotide-gated K+ 1	-0.431078	0.000141395	0.016848
ENSMUSG00000035615	Frmpd1	4	FERM and PDZ domain containing 1	-0.43016	0.00088142	0.0541183
ENSMUSG00000029503	P2rx2	5	purinergic receptor P2X, ligand-gated ion channel, 2	-0.424889	6.03537e-05	0.00903133
ENSMUSG00000068373	D430041D05Rik	2	RIKEN cDNA D430041D05 gene	-0.422513	0.000220129	0.0226526
ENSMUSG00000020599	Rgs9	11	regulator of G-protein signaling 9	-0.421991	9.50183e-05	0.0128236
ENSMUSG00000101337	Dnah7c	1	dynein, axonemal, heavy chain 7C	-0.417717	0.000708497	0.046849
ENSMUSG00000047636	Cdcp2	4	CUB domain containing protein 2	-0.413345	0.000138477	0.0166426
ENSMUSG00000037492	Zmat4	8	zinc finger, matrin type 4	-0.407645	7.82881e-06	0.00189489
ENSMUSG00000028528	Dnajc6	4	DnaJ heat shock protein family (Hsp40) member C6	-0.407047	0.000228232	0.0230542
ENSMUSG00000045744	Bricd5	17	BRICHOS domain containing 5	-0.404211	1.68203e-05	0.00318329
ENSMUSG00000049122	Frmd3	4	FERM domain containing 3	-0.402202	0.000196082	0.0213807
ENSMUSG00000049100	Pcdh10	3	protocadherin 10	-0.399016	0.0004758	0.0367736
ENSMUSG00000018581	Dnah11	12	dynein, axonemal, heavy chain 11	-0.398217	7.98907e-07	0.00031319
ENSMUSG00000024810	Il33	19	interleukin 33	-0.39519	3.09416e-07	0.000175674
ENSMUSG00000048078	Tenm4	7	teneurin transmembrane protein 4	-0.393277	0.00031538	0.0290224
ENSMUSG00000031548	Sfrp1	8	secreted frizzled-related protein 1	-0.393138	2.61198e-06	0.000796411
ENSMUSG00000027536	Chmp4c	3	charged multivesicular body protein 4C	-0.388313	0.000620905	0.0424199
ENSMUSG00000009487	Otog	7	otogelin	-0.387986	0.000389291	0.0327327
ENSMUSG00000031089	Slc6a14	X	solute carrier family 6 (neurotransmitter transporter), member 14	-0.387757	0.000128737	0.0157011
ENSMUSG00000026980	Ly75	2	lymphocyte antigen 75	-0.384183	9.63725e-05	0.0128475
ENSMUSG00000031298	Adgrg2	X	adhesion G protein-coupled receptor G2	-0.377801	5.24845e-05	0.00800145
ENSMUSG00000003411	Rab3b	4	RAB3B, member RAS oncogene family	-0.376855	0.000645452	0.043734
ENSMUSG00000055567	Unc80	1	unc-80, NALCN activator	-0.376195	1.57247e-05	0.00301054
ENSMUSG00000029570	Lfng	5	LFNG O-fucosylpeptide 3-beta-N-acetylglucosaminyltransferase	-0.375121	1.5295e-07	0.00010493
ENSMUSG00000028328	Tmod1	4	tropomodulin 1	-0.373999	3.56327e-06	0.00104767
ENSMUSG00000050587	Lrrc4c	2	leucine rich repeat containing 4C	-0.373777	0.000226129	0.0229828
ENSMUSG00000042567	Nek10	14	NIMA (never in mitosis gene a)- related kinase 10	-0.371785	0.00038074	0.0327327
ENSMUSG00000014773	Dll1	17	delta like canonical Notch ligand 1	-0.371313	8.71584e-05	0.0119862
ENSMUSG00000052861	Dnah6	6	dynein, axonemal, heavy chain 6	-0.369702	0.000265439	0.0256509
ENSMUSG00000091455	Otogl	10	otogelin-like	-0.369492	5.56942e-06	0.00147904
ENSMUSG00000066392	Nrxn3	12	neurexin III	-0.368867	7.76745e-06	0.00189489
ENSMUSG00000038064	Cldn22	8	claudin 22	-0.367783	0.000321053	0.0292005
ENSMUSG00000052613	Pcdh15	10	protocadherin 15	-0.364134	2.14935e-06	0.000693904
ENSMUSG00000047821	Trim16	11	tripartite motif-containing 16	-0.354649	9.81536e-05	0.012881
ENSMUSG00000022425	Enpp2	15	ectonucleotide pyrophosphatase/phosphodiesterase 2	-0.351305	0.000326819	0.0294047
ENSMUSG00000070407	Hs3st3b1	11	heparan sulfate (glucosamine) 3-O-sulfotransferase 3B1	-0.350929	0.000142233	0.016848
ENSMUSG00000026173	Plcd4	1	phospholipase C, delta 4	-0.348165	1.43139e-05	0.00277269
ENSMUSG00000034324	Tmem132c	5	transmembrane protein 132C	-0.345584	4.89022e-06	0.00134196
ENSMUSG00000042216	Sgsm1	5	small G protein signaling modulator 1	-0.3424	0.000321004	0.0292005
ENSMUSG00000066108	Muc5b	7	mucin 5, subtype B, tracheobronchial	-0.341275	0.000405553	0.0333871
ENSMUSG00000022577	Ly6h	15	lymphocyte antigen 6 complex, locus H	-0.341271	0.000171094	0.0192075
ENSMUSG00000042808	Gpx2	12	glutathione peroxidase 2	-0.338508	0.000675135	0.0452729
ENSMUSG00000027376	Prom2	2	prominin 2	-0.337526	0.000480812	0.0367736
ENSMUSG00000015134	Aldh1a3	7	aldehyde dehydrogenase family 1, subfamily A3	-0.336643	0.000110193	0.0141744
ENSMUSG00000000305	Cdh4	2	cadherin 4	-0.333406	9.8573e-05	0.012881
ENSMUSG00000006435	Neurl1a	19	neuralized E3 ubiquitin protein ligase 1A	-0.332874	0.000479694	0.0367736
ENSMUSG00000037705	Tecta	9	tectorin alpha	-0.330757	0.000676413	0.0452729
ENSMUSG00000047935	Sox1ot	8	Sox1 overlapping transcript	-0.325389	0.000154771	0.0178203
ENSMUSG00000017978	Cadps2	6	Ca2+-dependent activator protein for secretion 2	-0.32273	0.000430693	0.0347616
ENSMUSG00000026452	Syt2	1	synaptotagmin II	-0.32213	0.000464689	0.0367736
ENSMUSG00000052920	Prkg1	19	protein kinase, cGMP-dependent, type I	-0.319551	0.000162341	0.0185622
ENSMUSG00000021986	Amer2	14	APC membrane recruitment 2	-0.318887	0.000757467	0.0489086
ENSMUSG00000025790	Slco3a1	7	solute carrier organic anion transporter family, member 3a1	-0.3173	9.67559e-05	0.0128475
ENSMUSG00000028518	Prkaa2	4	protein kinase, AMP-activated, alpha 2 catalytic subunit	-0.317177	0.000149672	0.0174777
ENSMUSG00000029999	Tgfa	6	transforming growth factor alpha	-0.310502	0.000127428	0.0156981
ENSMUSG00000022533	Atp13a3	16	ATPase type 13A3	-0.310358	0.000390927	0.0327327
ENSMUSG00000030862	Cpxm2	7	carboxypeptidase X 2 (M14 family)	-0.31032	1.36283e-05	0.00271548
ENSMUSG00000034990	Otoa	7	otoancorin	-0.308862	2.00939e-05	0.00370918
ENSMUSG00000030930	Chst15	7	carbohydrate (N-acetylgalactosamine 4-sulfate 6-O) sulfotransferase 15	-0.308039	0.000518241	0.0386101
ENSMUSG00000034220	Gpc1	1	glypican 1	-0.307261	8.73577e-05	0.0119862
ENSMUSG00000020122	Egfr	11	epidermal growth factor receptor	-0.305721	2.89003e-05	0.00490561
ENSMUSG00000049791	Fzd4	7	frizzled class receptor 4	-0.304702	0.000263767	0.0256509
ENSMUSG00000033949	Trim36	18	tripartite motif-containing 36	-0.303436	2.02749e-05	0.00370918
ENSMUSG00000023959	Clic5	17	chloride intracellular channel 5	-0.302656	0.000476585	0.0367736
ENSMUSG00000030093	Wnt7a	6	wingless-type MMTV integration site family, member 7A	-0.299179	0.000713977	0.0470225
ENSMUSG00000030772	Dkk3	7	dickkopf WNT signaling pathway inhibitor 3	-0.296167	0.000448588	0.0358543
ENSMUSG00000021508	Cxcl14	13	chemokine (C-X-C motif) ligand 14	-0.296145	0.000763357	0.0490964
ENSMUSG00000073043	Atoh1	6	atonal bHLH transcription factor 1	-0.293716	0.000270598	0.0259035
ENSMUSG00000042599	Kdm7a	6	lysine (K)-specific demethylase 7A	-0.292396	6.05907e-05	0.00903133
ENSMUSG00000035916	Ptprq	10	protein tyrosine phosphatase, receptor type, Q	-0.287257	5.32948e-06	0.00143852
ENSMUSG00000062372	Otof	5	otoferlin	-0.286539	0.000585241	0.0411795
ENSMUSG00000058589	Anks1b	10	ankyrin repeat and sterile alpha motif domain containing 1B	-0.28579	6.92402e-05	0.00982793
ENSMUSG00000022358	Fbxo32	15	F-box protein 32	-0.278792	0.000247481	0.0245468
ENSMUSG00000020218	Wif1	10	Wnt inhibitory factor 1	-0.276735	0.000774783	0.049445
ENSMUSG00000048388	Fam171b	2	family with sequence similarity 171, member B	-0.274219	0.000215904	0.0223576
ENSMUSG00000043003	Rasef	4	RAS and EF hand domain containing	-0.273581	0.000337176	0.0300086
ENSMUSG00000039963	Ccdc40	11	coiled-coil domain containing 40	-0.2705	0.000474856	0.0367736
ENSMUSG00000021281	Tnfaip2	12	tumor necrosis factor, alpha-induced protein 2	-0.267503	0.000639067	0.0434803
ENSMUSG00000020598	Nrcam	12	neuronal cell adhesion molecule	-0.2665	0.000390827	0.0327327
ENSMUSG00000020014	Cfap54	10	cilia and flagella associated protein 54	-0.263682	0.000564931	0.0402715
ENSMUSG00000031626	Sorbs2	8	sorbin and SH3 domain containing 2	-0.263586	0.000404288	0.0333871
ENSMUSG00000042680	Garem1	18	GRB2 associated regulator of MAPK1 subtype 1	-0.256199	0.00079071	0.0500732
ENSMUSG00000020841	Cpd	11	carboxypeptidase D	-0.252293	0.000497558	0.0376415
ENSMUSG00000029090	Adgra3	5	adhesion G protein-coupled receptor A3	-0.243549	6.08854e-05	0.00903133
ENSMUSG00000019124	Scrn1	6	secernin 1	-0.240059	0.000309425	0.0287835
ENSMUSG00000025932	Eya1	1	EYA transcriptional coactivator and phosphatase 1	-0.231723	0.000198278	0.0214779
ENSMUSG00000078965	Gm12033	11	predicted gene 12033	-0.0859558	0.000693025	0.046197
