# Supplementary material for: The dark kinase STK32A regulates hair cell planar polarity opposite of EMX2 in the developing mouse inner ear
Source: eLife. 2023 May 5;12:e84910. doi: 10.7554/eLife.84910 (PMC10202454; doi:10.7554/eLife.84910)
Supplement: Supplementary file 2. — Summary of genes that are up-regulated in the absence of Emx2. Sequencing results were analyzed using Bioconductor DESeq as well as post hoc-analysis using Swish, and Benjamini-Hirshberg false discover rate was used to normalize data across all transcripts and produce adjusted p-values based on log2-fold changes between Emx2 Cre/Cre and WT controls. Only genes with adjusted P-values <0.05 are listed. Red shading highlights Stk32a. [file elife-84910-supp2.xlsx]

## Sheet: Increased expression
Table 2: Genes with increased transcription in the Emx2 mutant utricle
Ensemble ID	Gene Name	Chromosome	Description	log2 Fold Change	p-value	adjusted p-value
ENSMUSG00000041607	Mbp	18	myelin basic protein	0.757588	6.23924e-11	2.05458e-07
ENSMUSG00000023000	Dhh	15	desert hedgehog	0.710019	1.73205e-09	2.85182e-06
ENSMUSG00000033227	Wnt6	1	wingless-type MMTV integration site family, member 6	0.699736	1.59065e-09	2.85182e-06
ENSMUSG00000042401	Crtac1	19	cartilage acidic protein 1	0.678993	6.95495e-08	5.72566e-05
ENSMUSG00000036634	Mag	7	myelin-associated glycoprotein	0.656549	1.51497e-07	0.00010493
ENSMUSG00000022449	Adamts20	15	a disintegrin-like and metallopeptidase (reprolysin type) with thrombospondin type 1 motif, 20	0.654115	2.12844e-07	0.00012516
ENSMUSG00000015467	Egfl8	17	EGF-like domain 8	0.647208	1.83687e-07	0.000116054
ENSMUSG00000018217	Pmp22	11	peripheral myelin protein 22	0.642791	1.36095e-13	1.1204e-09
ENSMUSG00000026413	Pkp1	1	plakophilin 1	0.625376	7.55296e-07	0.000310899
ENSMUSG00000074852	Hpse2	19	heparanase 2	0.621692	8.54185e-10	1.75802e-06
ENSMUSG00000039070	Cpa4	6	carboxypeptidase A4	0.618454	8.71032e-08	6.8293e-05
ENSMUSG00000069272	Hist1h2ae	13	histone cluster 1, H2ae	0.609325	7.78974e-07	0.000312824
ENSMUSG00000064325	Hhip	8	Hedgehog-interacting protein	0.605024	1.00798e-06	0.00037581
ENSMUSG00000053117	E330013P04Rik	19	RIKEN cDNA E330013P04 gene	0.601437	2.22461e-06	0.000698587
ENSMUSG00000034361	Cpne2	8	copine II	0.589091	1.39365e-06	0.000468295
ENSMUSG00000025094	Slc18a2	19	solute carrier family18 (vesicular monoamine), member2	0.582957	9.75158e-08	7.29817e-05
ENSMUSG00000033998	Kcnk1	8	potassium channel, subfamily K, member 1	0.576741	1.02711e-06	0.00037581
ENSMUSG00000022324	Matn2	15	matrilin 2	0.569301	7.51489e-07	0.000310899
ENSMUSG00000050840	Cdh20	1	cadherin 20	0.563746	4.76198e-06	0.00132892
ENSMUSG00000013523	Bcas1	2	breast carcinoma amplified sequence 1	0.563241	6.46265e-06	0.00166262
ENSMUSG00000039954	Stk32a	18	serine/threonine kinase 32A	0.557416	3.88043e-06	0.00110157
ENSMUSG00000059921	Unc5c	3	unc-5 netrin receptor C	0.548211	1.31764e-06	0.000451978
ENSMUSG00000020061	Mybpc1	10	myosin binding protein C, slow-type	0.543305	5.66927e-10	1.55574e-06
ENSMUSG00000037280	Galnt6	15	polypeptide N-acetylgalactosaminyltransferase 6	0.53766	2.28074e-05	0.00412664
ENSMUSG00000046167	Gldn	9	gliomedin	0.533416	2.63587e-05	0.00456838
ENSMUSG00000037868	Egr2	10	early growth response 2	0.522015	3.79995e-05	0.00607439
ENSMUSG00000059003	Grin2a	16	glutamate receptor, ionotropic, NMDA2A (epsilon 1)	0.521682	3.75489e-05	0.00606121
ENSMUSG00000030048	Gkn3	6	gastrokine 3	0.519982	2.12344e-08	2.33083e-05
ENSMUSG00000053198	Prx	7	periaxin	0.518555	2.51513e-05	0.00445285
ENSMUSG00000056569	Mpz	1	myelin protein zero	0.518114	5.6611e-06	0.00147952
ENSMUSG00000024659	Anxa1	19	annexin A1	0.517928	2.27869e-08	2.34492e-05
ENSMUSG00000025375	Aatk	11	apoptosis-associated tyrosine kinase	0.513041	8.82607e-06	0.00199796
ENSMUSG00000027375	Mal	2	myelin and lymphocyte protein, T cell differentiation protein	0.50373	7.82905e-06	0.00189489
ENSMUSG00000069309	Hist1h2an	13	histone cluster 1, H2an	0.498897	1.28266e-05	0.00267329
ENSMUSG00000027559	Car3	3	carbonic anhydrase 3	0.497403	2.93488e-09	4.39297e-06
ENSMUSG00000087095	Emx2os	19	Emx2 opposite strand/antisense transcript (non-protein coding)	0.49218	8.90249e-05	0.012114
ENSMUSG00000056966	Gjc3	5	gap junction protein, gamma 3	0.477896	8.20714e-05	0.0114517
ENSMUSG00000027978	Prss12	3	protease, serine 12 neurotrypsin (motopsin)	0.477529	0.000171485	0.0192075
ENSMUSG00000000394	Gcg	2	glucagon	0.471834	2.79558e-06	0.000836894
ENSMUSG00000091478	Gm10039	11	predicted pseudogene 10039	0.467924	0.000222276	0.0227315
ENSMUSG00000090125	Pou3f1	4	POU domain, class 3, transcription factor 1	0.467838	0.000208906	0.0222746
ENSMUSG00000031963	Bmper	9	BMP-binding endothelial regulator	0.467564	7.94092e-06	0.00189489
ENSMUSG00000024600	Slc27a6	18	solute carrier family 27 (fatty acid transporter), member 6	0.466565	0.000230067	0.0230979
ENSMUSG00000032355	Mlip	9	muscular LMNA-interacting protein	0.463873	0.000204424	0.021999
ENSMUSG00000035158	Mitf	6	melanogenesis associated transcription factor	0.463462	6.70474e-05	0.00968365
ENSMUSG00000091243	Vgll3	16	vestigial like family member 3	0.456601	0.000322775	0.0292005
ENSMUSG00000041789	2700046A07Rik	18	RIKEN cDNA 2700046A07 gene	0.448227	0.000418623	0.0341219
ENSMUSG00000085069	Gm13111	4	predicted gene 13111	0.444671	0.000315518	0.0290224
ENSMUSG00000033910	Gucy1a1	3	guanylate cyclase 1, soluble, alpha 1	0.442451	1.3638e-05	0.00271548
ENSMUSG00000050550	Gm11868	4	predicted gene 11868	0.441707	0.000532006	0.0393532
ENSMUSG00000069372	Ctxn3	18	cortexin 3	0.439734	0.000382606	0.0327327
ENSMUSG00000004655	Aqp1	6	aquaporin 1	0.439643	4.82788e-08	4.18374e-05
ENSMUSG00000027199	Gatm	2	glycine amidinotransferase (L-arginine:glycine amidinotransferase)	0.436235	6.86323e-05	0.00982635
ENSMUSG00000030346	Rad51ap1	6	RAD51 associated protein 1	0.436206	0.000511481	0.0382938
ENSMUSG00000047976	Kcna1	6	potassium voltage-gated channel, shaker-related subfamily, member 1	0.433762	0.000612279	0.0421806
ENSMUSG00000043531	Sorcs1	19	sortilin-related VPS10 domain containing receptor 1	0.43367	1.35837e-05	0.00271548
ENSMUSG00000021904	Sema3g	14	sema domain, immunoglobulin domain (Ig), short basic domain, secreted, (semaphorin) 3G	0.433559	4.89385e-05	0.00753059
ENSMUSG00000020811	Wscd1	11	WSC domain containing 1	0.43282	5.0797e-07	0.000238963
ENSMUSG00000063564	Col23a1	11	collagen, type XXIII, alpha 1	0.432281	3.76657e-07	0.000200053
ENSMUSG00000033579	Fa2h	8	fatty acid 2-hydroxylase	0.432217	0.000705558	0.0468428
ENSMUSG00000025348	Itga7	10	integrin alpha 7	0.426891	0.000532995	0.0393532
ENSMUSG00000026676	Ccdc3	2	coiled-coil domain containing 3	0.42375	0.000274199	0.0260964
ENSMUSG00000025092	Hspa12a	19	heat shock protein 12A	0.423719	1.12106e-05	0.00236643
ENSMUSG00000031385	Plxnb3	X	plexin B3	0.421987	0.000163864	0.018607
ENSMUSG00000022206	Npr3	15	natriuretic peptide receptor 3	0.421585	4.27798e-05	0.00664499
ENSMUSG00000100706	Gm19744	8	predicted gene, 19744	0.420512	0.000556076	0.0401781
ENSMUSG00000097789	Gm2115	7	predicted gene 2115	0.418492	0.000393628	0.0327327
ENSMUSG00000044533	Rps2	17	ribosomal protein S2	0.41768	0.000112579	0.0142585
ENSMUSG00000074170	Plekhf1	7	pleckstrin homology domain containing, family F (with FYVE domain) member 1	0.416702	0.000550332	0.0401781
ENSMUSG00000037347	Chst7	X	carbohydrate (N-acetylglucosamino) sulfotransferase 7	0.416343	0.000391542	0.0327327
ENSMUSG00000104453	Gm37829	7	predicted gene, 37829	0.411888	0.000266402	0.0256509
ENSMUSG00000037625	Cldn11	3	claudin 11	0.410582	0.00011218	0.0142585
ENSMUSG00000066058	Cldn19	4	claudin 19	0.40751	0.000302484	0.0282977
ENSMUSG00000020644	Id2	12	inhibitor of DNA binding 2	0.407369	1.11253e-06	0.000389739
ENSMUSG00000052468	Pmp2	3	peripheral myelin protein 2	0.405242	4.19884e-05	0.00664499
ENSMUSG00000029287	Tgfbr3	5	transforming growth factor, beta receptor III	0.399499	0.000179286	0.0198118
ENSMUSG00000114279	Hist1h2bm	13	histone cluster 1, H2bm	0.397788	0.000421358	0.0341756
ENSMUSG00000020186	Csrp2	10	cysteine and glycine-rich protein 2	0.397403	0.000366718	0.0323423
ENSMUSG00000022894	Adamts5	16	a disintegrin-like and metallopeptidase (reprolysin type) with thrombospondin type 1 motif, 5 (aggrecanase-2)	0.396299	0.000378404	0.0327327
ENSMUSG00000036446	Lum	10	lumican	0.395416	0.000391919	0.0327327
ENSMUSG00000033214	Slitrk5	14	SLIT and NTRK-like family, member 5	0.395228	7.96635e-05	0.0112108
ENSMUSG00000025154	Arhgap19	19	Rho GTPase activating protein 19	0.390034	0.000238869	0.0238362
ENSMUSG00000027962	Vcam1	3	vascular cell adhesion molecule 1	0.38798	9.65176e-06	0.00211888
ENSMUSG00000046618	Olfml2a	2	olfactomedin-like 2A	0.387459	0.000557762	0.0401781
ENSMUSG00000044288	Cnr1	4	cannabinoid receptor 1 (brain)	0.384165	0.0002137	0.0222899
ENSMUSG00000079553	Kifc1	17	kinesin family member C1	0.382366	0.000732438	0.0476664
ENSMUSG00000037014	Sstr4	2	somatostatin receptor 4	0.375148	0.000721116	0.0473035
ENSMUSG00000045629	Sh3tc2	18	SH3 domain and tetratricopeptide repeats 2	0.373746	6.30287e-05	0.00926578
ENSMUSG00000020467	Efemp1	11	epidermal growth factor-containing fibulin-like extracellular matrix protein 1	0.373598	0.00046903	0.0367736
ENSMUSG00000028004	Npy2r	3	neuropeptide Y receptor Y2	0.371566	5.05621e-07	0.000238963
ENSMUSG00000047746	Fbxo40	16	F-box protein 40	0.367968	0.00041392	0.0339064
ENSMUSG00000037071	Scd1	19	stearoyl-Coenzyme A desaturase 1	0.367807	0.000498381	0.0376415
ENSMUSG00000063975	Slco1a5	6	solute carrier organic anion transporter family, member 1a5	0.366773	0.000151611	0.0175794
ENSMUSG00000101355	Hist1h3h	13	histone cluster 1, H3h	0.366038	0.00059517	0.0415232
ENSMUSG00000059213	Ddn	15	dendrin	0.364881	8.33899e-06	0.00194161
ENSMUSG00000030849	Fgfr2	7	fibroblast growth factor receptor 2	0.363951	0.000367325	0.0323423
ENSMUSG00000021390	Ogn	13	osteoglycin	0.361666	9.29378e-06	0.00206787
ENSMUSG00000006782	Cnp	11	2',3'-cyclic nucleotide 3' phosphodiesterase	0.356645	0.000127758	0.0156981
ENSMUSG00000032135	Mcam	9	melanoma cell adhesion molecule	0.355207	0.000213896	0.0222899
ENSMUSG00000055409	Nell1	7	NEL-like 1	0.349551	0.000148825	0.0174777
ENSMUSG00000042303	Sgsm3	15	small G protein signaling modulator 3	0.344317	0.000543324	0.0399367
ENSMUSG00000020897	Aurkb	11	aurora kinase B	0.341156	0.000482423	0.0367736
ENSMUSG00000059974	Ntm	9	neurotrimin	0.33295	0.000280319	0.0265256
ENSMUSG00000068220	Lgals1	15	lectin, galactose binding, soluble 1	0.331957	0.000100288	0.0130019
ENSMUSG00000031453	Rasa3	8	RAS p21 protein activator 3	0.329096	1.36887e-05	0.00271548
ENSMUSG00000052336	Cx3cr1	9	chemokine (C-X3-C motif) receptor 1	0.329048	0.000370126	0.0324156
ENSMUSG00000040675	Mthfd1l	10	methylenetetrahydrofolate dehydrogenase (NADP+ dependent) 1-like	0.326813	0.000728816	0.0476189
ENSMUSG00000003617	Cp	3	ceruloplasmin	0.322923	0.000589329	0.0412907
ENSMUSG00000001786	Fbxo7	10	F-box protein 7	0.321796	0.000601035	0.041658
ENSMUSG00000024529	Lox	18	lysyl oxidase	0.318917	0.00028424	0.0267429
ENSMUSG00000037031	Tspan15	10	tetraspanin 15	0.318512	1.4107e-05	0.00276515
ENSMUSG00000026728	Vim	2	vimentin	0.318458	2.56225e-05	0.00448802
ENSMUSG00000051615	Rap2a	14	RAS related protein 2a	0.310891	0.00021234	0.0222899
ENSMUSG00000007872	Id3	4	inhibitor of DNA binding 3	0.31026	0.000469025	0.0367736
ENSMUSG00000035407	Kank4	4	KN motif and ankyrin repeat domains 4	0.310231	0.000209691	0.0222746
ENSMUSG00000034164	Emid1	11	EMI domain containing 1	0.309878	1.73998e-05	0.00325554
ENSMUSG00000025083	Afap1l2	19	actin filament associated protein 1-like 2	0.301824	0.000665837	0.0449303
ENSMUSG00000015852	Fcrls	3	Fc receptor-like S, scavenger receptor	0.300403	0.000602162	0.041658
ENSMUSG00000026100	Mstn	1	myostatin	0.298724	1.70607e-06	0.000561809
ENSMUSG00000024981	Acsl5	19	acyl-CoA synthetase long-chain family member 5	0.293555	0.000175731	0.0195501
ENSMUSG00000024621	Csf1r	18	colony stimulating factor 1 receptor	0.280232	0.000372895	0.0324853
ENSMUSG00000026712	Mrc1	2	mannose receptor, C type 1	0.278594	0.000445744	0.0358009
ENSMUSG00000046593	Tmem215	4	transmembrane protein 215	0.269527	8.85823e-06	0.00199796
ENSMUSG00000024663	Rab3il1	19	RAB3A interacting protein (rabin3)-like 1	0.267704	0.000564999	0.0402715
ENSMUSG00000004105	Angptl2	2	angiopoietin-like 2	0.264716	0.000555858	0.0401781
ENSMUSG00000030541	Idh2	7	isocitrate dehydrogenase 2 (NADP+), mitochondrial	0.256699	0.000558808	0.0401781
ENSMUSG00000001525	Tubb5	17	tubulin, beta 5 class I	0.254027	3.75441e-05	0.00606121
ENSMUSG00000030978	Rrm1	7	ribonucleotide reductase M1	0.245608	0.00058043	0.0410162
